# Supplementary material
Source: PubMed Central journal article supplement (PMC2758308)
Supplement: djp271_1.pdf [file djp271_1.pdf]

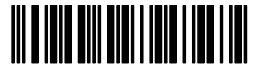

STUDY ID

|  |  |  |  |
|--|--|--|--|
|  |  |  |  |
|--|--|--|--|

# **A Study of Women's Experiences with Treatment for Breast Cancer**

**Conducted by:**

**University of Southern California  
Keck School of Medicine**

**Return to: Breast Cancer Treatment Study  
Parkview Medical Building PMB-A201  
1420 San Pablo Street  
Los Angeles, CA 90089-9047**

**Questions? Please call 323.442.2712**

This study is funded by a grant from the National Institutes of Health and has been approved by the Institutional Review Boards of University of Michigan and University of Southern California.

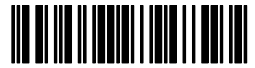

## Study of Women's Experiences with Treatment for Breast Cancer

This is a study about how treatment decisions are made for women when they are diagnosed with breast cancer and what women think about the quality of their health care experiences. Thank you for agreeing to be part of this study. Your answers are very important to us. Any information you provide is strictly confidential and will not be shared with anyone outside of the study. Your answers will be combined with those of everyone else in the study so no one individual can be identified. There are no right or wrong answers so please give the answers that best describe your situation.

### General Instructions

PLEASE READ THESE INSTRUCTIONS CAREFULLY

- Answer each question as best you can. Please do not leave any blank. (However, if you feel that you do not wish to answer a question, please write 'skip' next to it and continue on to the next question).
- Please fill in the oval next to your answer completely using blue or black ink.  
**Example:** Fill in ovals completely, like this:  Yes  
Not like this:  No Or this:  No
- Please follow any instructions that direct you to the next question.  
**Example:**  No (Please go to question C13)
- If you mark an answer with a line after it, please write the specific information on the line.  
**Example:**  Other (please specify) *my friend who is a doctor*
- Mark only **one** response for each question, **unless** other instructions are given (e.g. Please mark **ALL** that apply).
- As much as possible, please try to answer all of the questions in one sitting.

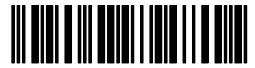

## Section A: Your Health

A1. How would you rate your current health?

Poor    Fair    Good    Very Good    Excellent

A2. Before you were told you have breast cancer, would you say your health was:

Poor    Fair    Good    Very Good    Excellent

A3. Before you were told you have breast cancer, had you ever been told by a doctor that you had any of the following health conditions?

a. Chronic bronchitis or emphysema                       Yes                       No

b. Heart disease such as coronary artery disease or congestive heart failure                       Yes                       No

c. Cancer, excluding skin cancer and breast cancer                       Yes                       No

d. Diabetes                       Yes                       No

e. High blood pressure                       Yes                       No

f. Stroke                       Yes                       No

g. Arthritis                       Yes                       No

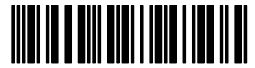

## Section B: Diagnosis and Treatment

- B1. How was a problem with your breast first discovered? **Please mark ONE.**
- The breast cancer was first detected on a routine mammogram.
  - A doctor or nurse found a lump during a breast exam.
  - I found a lump.
  - My husband/partner found a lump.
  - I noticed other breast symptoms such as pain, inflammation or nipple discharge.
  - Other (please explain) \_\_\_\_\_  
\_\_\_\_\_
- B2. How much time passed between when a problem with your breast was first noticed and your breast cancer was diagnosed with a biopsy test (a procedure where tissue or cells are taken from the breast to test for cancer)?
- less than a month
  - 1 - 3 months
  - 4 - 6 months
  - more than 6 months
- B3. How much time passed between when your breast cancer was first diagnosed with a biopsy test and you had surgery for your breast cancer?
- less than a month
  - 1 - 3 months
  - 4 - 6 months
  - more than 6 months
  - I haven't had additional surgery after the biopsy.

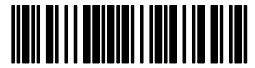

Two different types of biopsies can be done to diagnose breast cancer. Some women have both. We would like to know which type you had.

B4. What type of biopsy (or biopsies) did you have to diagnose your breast cancer?

**Please mark ALL that apply.**

A **needle biopsy** (when a needle is used to take tissue or cells from the breast to test for cancer).

An **excisional biopsy** (when a surgeon cuts out some breast tissue to examine it for cancer).

Other (please explain) \_\_\_\_\_

B5. On which breast did you have the biopsy (or biopsies)?

Right

Left

Both

B6. What is the name of the doctor who did the biopsy (or biopsies)? \_\_\_\_\_

B7. Where is this doctor located?

Name of hospital and/or clinic: \_\_\_\_\_

City: \_\_\_\_\_

B8. Did you have to go back to the doctor more than one time to have a biopsy done?

No

Yes → How many times? \_\_\_\_\_

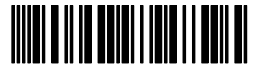

## Section C: Your Surgical Treatment

The next group of questions asks about discussions you may have had with any surgeon about treating your breast cancer.

C1. Was a family member or friend with you at any time when you were discussing surgical treatment options with any surgeon?

- No
- Yes

C2. Which procedure (that is, a lumpectomy or mastectomy) did the first surgeon that you talked to recommend?

- The surgeon did not recommend one procedure over the other.
- The surgeon recommended a lumpectomy.  
(The removal of the cancer and some surrounding tissue)
- The surgeon recommended a mastectomy.  
(The removal of the entire breast)

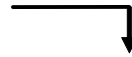

a. What reason did he/she give for recommending a mastectomy? **Please mark ALL that apply.**

- The lump in my breast was too big to have a lumpectomy.
- My breast was too small to have a lumpectomy.
- The cancer had spread to too many places in the breast.
- The initial surgery did not get all of the cancer.
- I'm not able to have radiation.
- Other (please explain)

---



---

C3. Did the first surgeon that you talked to perform your lumpectomy or mastectomy?

No

Yes → a. What is his/her name? \_\_\_\_\_

b. What is the name of the hospital where you had your surgery?

---

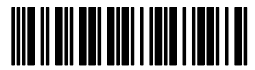

C4. Please indicate which factors below describe how the first surgeon was selected.

|                                                                                  |                                                    |
|----------------------------------------------------------------------------------|----------------------------------------------------|
| a. I was referred by another doctor. . . . .                                     | <input type="radio"/> Yes <input type="radio"/> No |
| b. I was referred by my health plan. . . . .                                     | <input type="radio"/> Yes <input type="radio"/> No |
| c. I selected the surgeon because of his/her reputation. . . . .                 | <input type="radio"/> Yes <input type="radio"/> No |
| d. I selected the surgeon because of the reputation of his/her hospital. . . . . | <input type="radio"/> Yes <input type="radio"/> No |
| e. I selected the surgeon because he/she practiced close to my home. . . . .     | <input type="radio"/> Yes <input type="radio"/> No |
| f. I already knew this surgeon. . . . .                                          | <input type="radio"/> Yes <input type="radio"/> No |
| g. Other (please explain) _____                                                  |                                                    |

C5. Before your surgery, did you talk with a second surgeon about surgical treatment options for your breast cancer (that is, whether to have a lumpectomy or mastectomy)?

Yes

No (please go to question C11, page 8) →

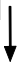

C6. Why did you decide to consult with a second surgeon? **Please mark ALL that apply.**

- I wanted to know more about breast cancer treatment options.
- I wanted to get a second opinion about my treatment options.
- I wasn't certain that I wanted to be treated by the first surgeon.
- Other (please explain) \_\_\_\_\_

C7. Please indicate which factors below describe how the second surgeon was selected.

- a. I was referred by another doctor. . . . .  Yes  No
- b. I was referred by my health plan. . . . .  Yes  No
- c. I selected the surgeon because of his/her reputation. . . . .  Yes  No
- d. I selected the surgeon because of the reputation of his/her hospital.  Yes  No
- e. I selected the surgeon because he/she practiced close to my home.  Yes  No
- f. I already knew this surgeon. . . . .  Yes  No
- g. Other (please explain) \_\_\_\_\_

Please continue on next page, Question C8.

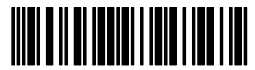

C8. Which procedure (that is, a lumpectomy or mastectomy) did the second surgeon recommend?

- The surgeon did not recommend one procedure over the other.
- The surgeon recommended a lumpectomy.
- The surgeon recommended a mastectomy.

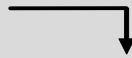

a. What reason did he/she give for recommending a mastectomy? **Please mark ALL that apply.**

- The lump in my breast was too big to have a lumpectomy.
- My breast was too small to have a lumpectomy.
- The cancer had spread to too many places in the breast.
- The initial surgery did not get all of the cancer.
- I'm not able to have radiation.
- Other (please explain)

---

---

C9. Did the second surgeon perform your lumpectomy or mastectomy?

No

Yes → a. What is his/her name? \_\_\_\_\_

b. What is the name of the hospital where you had your surgery?

---

c. Why did you have this surgeon perform your surgery?

---

---

C10. Did you consult with any other surgeons?

Yes

No

Please continue on next page, Question C11.



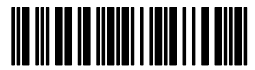

Before your surgery, did any surgeon or their staff...

|                                                                                                                                                             |                              |                             |                                           |
|-------------------------------------------------------------------------------------------------------------------------------------------------------------|------------------------------|-----------------------------|-------------------------------------------|
| C11. ...explain that women who have a mastectomy usually do not need radiation therapy? .....                                                               | <input type="radio"/><br>Yes | <input type="radio"/><br>No | <input type="radio"/><br>I don't remember |
| C12. ...explain that if you have a lumpectomy you might need more surgery to remove remaining breast cancer. ....                                           | <input type="radio"/><br>Yes | <input type="radio"/><br>No | <input type="radio"/><br>I don't remember |
| C13. ...explain that the chance of breast cancer coming back in the area of the surgery may differ depending on which surgical treatment you receive? ..... | <input type="radio"/><br>Yes | <input type="radio"/><br>No | <input type="radio"/><br>I don't remember |
| C14. ...explain that there are different types of breast reconstruction such as breast implants or using your own tissue to create a new breast? .....      | <input type="radio"/><br>Yes | <input type="radio"/><br>No | <input type="radio"/><br>I don't remember |
| C15. ...explain that breast reconstruction can be done either at the same time that a mastectomy is done or later? .....                                    | <input type="radio"/><br>Yes | <input type="radio"/><br>No | <input type="radio"/><br>I don't remember |

C16. What other types of doctors did you consult with before your surgery?

- A radiation oncologist (a doctor who specializes in radiation treatment).
- A medical oncologist (a doctor who specializes in chemotherapy).
- A plastic surgeon (a doctor who performs breast reconstruction).
- I didn't consult with any other doctor before my surgery.
- Other (please explain)

---

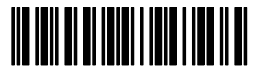

C17. How much did your surgeon (that is, the one who performed your surgery) participate in the decision about whether to have radiation?

|                       |                       |                       |                       |                       |
|-----------------------|-----------------------|-----------------------|-----------------------|-----------------------|
| <input type="radio"/> |
| Not at all            | A little              | Somewhat              | Quite a bit           | Very much             |

C18. How much did your surgeon participate in the decision about whether to have chemotherapy?

|                       |                       |                       |                       |                       |
|-----------------------|-----------------------|-----------------------|-----------------------|-----------------------|
| <input type="radio"/> |
| Not at all            | A little              | Somewhat              | Quite a bit           | Very much             |

C19. How much did your surgeon participate in the decision about whether to have breast reconstruction?

|                       |                       |                       |                       |                       |
|-----------------------|-----------------------|-----------------------|-----------------------|-----------------------|
| <input type="radio"/> |
| Not at all            | A little              | Somewhat              | Quite a bit           | Very much             |

C20. How much did a medical oncologist (or chemotherapy doctor) participate in treatment decisions for your breast cancer?

|                                    |                       |                       |                       |                       |           |
|------------------------------------|-----------------------|-----------------------|-----------------------|-----------------------|-----------|
| <input type="radio"/>              | <input type="radio"/> | <input type="radio"/> | <input type="radio"/> | <input type="radio"/> |           |
| I did not see this type of doctor. | Not at all            | A little              | Somewhat              | Quite a bit           | Very much |

C21. How much did a radiation oncologist participate in treatment decisions for your breast cancer?

|                                    |                       |                       |                       |                       |           |
|------------------------------------|-----------------------|-----------------------|-----------------------|-----------------------|-----------|
| <input type="radio"/>              | <input type="radio"/> | <input type="radio"/> | <input type="radio"/> | <input type="radio"/> |           |
| I did not see this type of doctor. | Not at all            | A little              | Somewhat              | Quite a bit           | Very much |

C22. How much did a plastic surgeon participate in the decision about whether to have breast reconstruction?

|                                    |                       |                       |                       |                       |           |
|------------------------------------|-----------------------|-----------------------|-----------------------|-----------------------|-----------|
| <input type="radio"/>              | <input type="radio"/> | <input type="radio"/> | <input type="radio"/> | <input type="radio"/> |           |
| I did not see this type of doctor. | Not at all            | A little              | Somewhat              | Quite a bit           | Very much |

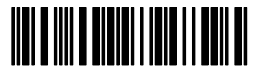

## Section D: Questions About Your Treatments

### Surgery

D1. What was the first surgery that you had to remove your breast cancer after the biopsy test?

I had a lumpectomy (removal of the cancer and some surrounding tissue).

I had a mastectomy (removal of the entire breast).  
**(please go to question D4)** →

I did not have any surgery after the biopsy.  
**(please go to question D4)** →

D2. Did you have to have a second lumpectomy to remove more breast tissue from the same breast?

No, I only had one lumpectomy.

Yes, I had to have another lumpectomy to remove more breast tissue.

D3. Did you have to have a mastectomy, later, on the same breast?

No, I did not have to have a mastectomy.

Yes, I had to have a mastectomy after my lumpectomy.

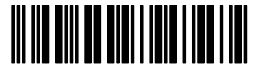

**Radiation Therapy**

D4. Did you or are you going to have radiation therapy to treat your breast cancer?

Yes → a. What is the name of the doctor who treated you or is going to treat you?

\_\_\_\_\_

b. Where did you go or are you going to have your radiation treatments?

Name of hospital and/or clinic: \_\_\_\_\_

City: \_\_\_\_\_

c. How many weeks of radiation treatments did you or are you going to have?

1 week

2 - 4 weeks

5 weeks or more

Other (please specify) \_\_\_\_\_

d. Did you have ALL of the radiation treatments that your doctor told you to have?

No

Yes

I'm still receiving treatment.

I'm going to start treatment.

e. Was your radiation treatment delayed for any reason?

No

Yes → Why? \_\_\_\_\_

\_\_\_\_\_

No → a. Why didn't you, or don't you plan to, have radiation therapy?

**Please mark ALL that apply.**

My doctor(s) did not discuss it with me.

My doctor(s) said I didn't need it.

My doctor(s) left it up to me and I chose not to.

I was worried about side effects or complications.

I was worried about the cost.

It would have been too much of a burden on me or my family.

Other (please explain)

\_\_\_\_\_

\_\_\_\_\_

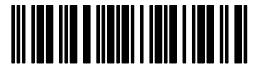

**Chemotherapy**

Chemotherapy is a treatment where women receive medicine by an intravenous tube to destroy cancer cells.

D5. Did you or are you going to have chemotherapy to treat your breast cancer?

Yes → a. What is the name of the doctor who treated you or is going to treat you?

\_\_\_\_\_

b. Where did you go or are you going to have your chemotherapy treatments?

Name of hospital and/or clinic: \_\_\_\_\_

City: \_\_\_\_\_

c. Did you have ALL of the chemotherapy treatments that your doctor told you to have?

No

Yes

I'm still receiving treatment.

I'm going to start treatment.

d. Were any of your chemotherapy treatments delayed for any reason?

No

Yes → Why? \_\_\_\_\_

\_\_\_\_\_

No → a. Why didn't you, or don't you plan to, have chemotherapy?

**Please mark ALL that apply.**

My doctor(s) did not discuss it with me.

My doctor(s) said I didn't need it.

My doctor(s) left it up to me and I chose not to.

I was worried about side effects or complications.

I didn't want to lose my hair.

I was worried about the cost.

It would have been too much of a burden on me or my family.

Other (please explain)

\_\_\_\_\_

\_\_\_\_\_

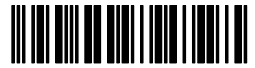

**Breast Reconstruction**

D6. Have you had breast reconstruction?

- Yes → a. What type of procedure did you have?
  - Breast implants or tissue expanders.
  - Breast reconstruction that uses your own tissue.
- b. Did you have breast reconstruction surgery at the same time as your mastectomy or later?
  - At the same time as my mastectomy.
  - I had it done later.
- c. Why did you decide to have breast reconstruction?

---

---

d. Are you satisfied with the results?

- Yes
- No → Why not? \_\_\_\_\_

---

No → a. Why haven't you had breast reconstruction?

**Please mark ALL that apply.**

- I had a lumpectomy.
- I'm planning to have it later.
- I'm still considering it.
- I didn't know how or where to get it.
- I was worried about the cost.
- I didn't want more surgery.
- It is not important to me to create a new breast.
- I'm afraid of implants.
- Other (please explain)

---

---

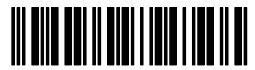

## Section E: Getting the Medical Care You Needed

We want to know about the experience you had when you went to see your doctor(s) for your breast cancer. **For each item below please mark the ONE response that best describes how much of a problem it was.**

E1. *When you were being treated for breast cancer, how much of a problem was. . .*

|                                                                                                   | Not<br>a problem      | Somewhat<br>of a problem | A big<br>problem      |
|---------------------------------------------------------------------------------------------------|-----------------------|--------------------------|-----------------------|
| a. ...finding doctor(s) to treat your breast cancer after it was diagnosed. . .                   | <input type="radio"/> | <input type="radio"/>    | <input type="radio"/> |
| b. ...the amount of money you paid for visits to your doctor(s). . . . .                          | <input type="radio"/> | <input type="radio"/>    | <input type="radio"/> |
| c. ...the amount of money you paid for treatments. . . . .                                        | <input type="radio"/> | <input type="radio"/>    | <input type="radio"/> |
| d. ...the amount of money you paid for medications. . . . .                                       | <input type="radio"/> | <input type="radio"/>    | <input type="radio"/> |
| e. ...getting an appointment with your doctor(s) when you had a problem. . . .                    | <input type="radio"/> | <input type="radio"/>    | <input type="radio"/> |
| f. ...waiting to see your doctor(s) once you arrived for your appointments. . . .                 | <input type="radio"/> | <input type="radio"/>    | <input type="radio"/> |
| g. ...getting to speak to your doctor(s) or their staff by phone when you had a question. . . . . | <input type="radio"/> | <input type="radio"/>    | <input type="radio"/> |
| h. ...getting to your doctor's office. . . . .                                                    | <input type="radio"/> | <input type="radio"/>    | <input type="radio"/> |
| i. ...scheduling your surgery at a time that was convenient for you. . . . .                      | <input type="radio"/> | <input type="radio"/>    | <input type="radio"/> |

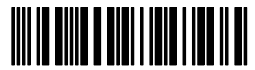

*When you were being treated for breast cancer:*

- E2. How often did you have problems understanding information about your breast cancer or your treatment because of difficulty with written information?

|                       |                       |                       |                       |                       |
|-----------------------|-----------------------|-----------------------|-----------------------|-----------------------|
| <input type="radio"/> |
| Always                | Often                 | Sometimes             | Occasionally          | Never                 |

- E3. How often did you have someone (like a family member, friend, hospital/clinic worker, or caregiver) help you read written information from the hospital or clinic?

|                       |                       |                       |                       |                       |
|-----------------------|-----------------------|-----------------------|-----------------------|-----------------------|
| <input type="radio"/> |
| Always                | Often                 | Sometimes             | Occasionally          | Never                 |

- E4. How often did you have problems filling out medical forms by yourself?

|                       |                       |                       |                       |                       |
|-----------------------|-----------------------|-----------------------|-----------------------|-----------------------|
| <input type="radio"/> |
| Always                | Often                 | Sometimes             | Occasionally          | Never                 |

**For each of the items below please mark the ONE response that best describes your opinion:**

- E5. I am satisfied that I was adequately informed about the issues important to the decision about what kind of surgery to have.

|                       |                       |                            |                       |                       |
|-----------------------|-----------------------|----------------------------|-----------------------|-----------------------|
| <input type="radio"/> | <input type="radio"/> | <input type="radio"/>      | <input type="radio"/> | <input type="radio"/> |
| Strongly disagree     | Disagree              | Neither agree nor disagree | Agree                 | Strongly agree        |

- E6. I am satisfied with the decision about what kind of surgery to have.

|                       |                       |                            |                       |                       |
|-----------------------|-----------------------|----------------------------|-----------------------|-----------------------|
| <input type="radio"/> | <input type="radio"/> | <input type="radio"/>      | <input type="radio"/> | <input type="radio"/> |
| Strongly disagree     | Disagree              | Neither agree nor disagree | Agree                 | Strongly agree        |

- E7. I wish I had given more consideration to other surgical treatment options.

|                       |                       |                            |                       |                       |
|-----------------------|-----------------------|----------------------------|-----------------------|-----------------------|
| <input type="radio"/> | <input type="radio"/> | <input type="radio"/>      | <input type="radio"/> | <input type="radio"/> |
| Strongly disagree     | Disagree              | Neither agree nor disagree | Agree                 | Strongly agree        |



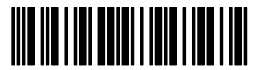

E8. I would like to have had more information when the decision about surgery was made.

|                       |                       |                            |                       |                       |
|-----------------------|-----------------------|----------------------------|-----------------------|-----------------------|
| <input type="radio"/> | <input type="radio"/> | <input type="radio"/>      | <input type="radio"/> | <input type="radio"/> |
| Strongly disagree     | Disagree              | Neither agree nor disagree | Agree                 | Strongly agree        |

E9. I would like to have participated more in making the decision about what kind of surgery to have.

|                       |                       |                            |                       |                       |
|-----------------------|-----------------------|----------------------------|-----------------------|-----------------------|
| <input type="radio"/> | <input type="radio"/> | <input type="radio"/>      | <input type="radio"/> | <input type="radio"/> |
| Strongly disagree     | Disagree              | Neither agree nor disagree | Agree                 | Strongly agree        |

E10. My level of participation in making the decision about what kind of surgery to have was more than I wanted.

|                       |                       |                            |                       |                       |
|-----------------------|-----------------------|----------------------------|-----------------------|-----------------------|
| <input type="radio"/> | <input type="radio"/> | <input type="radio"/>      | <input type="radio"/> | <input type="radio"/> |
| Strongly disagree     | Disagree              | Neither agree nor disagree | Agree                 | Strongly agree        |

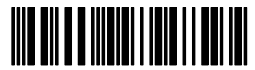

## Section F: Coordinating Your Care

We would like to learn about the help you received during your breast cancer treatment. **Please mark the response that best describes your experience.**

F1. How often did your surgeon(s) or their staff help you with referrals to other doctors for treatments such as radiation or chemotherapy?

|                       |                       |                       |                       |                       |
|-----------------------|-----------------------|-----------------------|-----------------------|-----------------------|
| <input type="radio"/> |
| Never                 | Rarely                | Sometimes             | Usually               | Always                |

F2. How often did you know who to ask when you had questions about breast cancer or your treatment?

|                       |                       |                       |                       |                       |
|-----------------------|-----------------------|-----------------------|-----------------------|-----------------------|
| <input type="radio"/> |
| Never                 | Rarely                | Sometimes             | Usually               | Always                |

F3. How often were you given confusing or contradictory information about breast cancer or your treatment?

|                       |                       |                       |                       |                       |
|-----------------------|-----------------------|-----------------------|-----------------------|-----------------------|
| <input type="radio"/> |
| Never                 | Rarely                | Sometimes             | Usually               | Always                |

F4. How often did you know what the next step in your treatment would be?

|                       |                       |                       |                       |                       |
|-----------------------|-----------------------|-----------------------|-----------------------|-----------------------|
| <input type="radio"/> |
| Never                 | Rarely                | Sometimes             | Usually               | Always                |

F5. How often did your doctor(s) have the medical information they needed to make decisions about your breast cancer treatment?

|                       |                       |                       |                       |                       |
|-----------------------|-----------------------|-----------------------|-----------------------|-----------------------|
| <input type="radio"/> |
| Never                 | Rarely                | Sometimes             | Usually               | Always                |

F6. Overall, how satisfied were you with how your doctors worked together?

|                       |                       |                       |                       |                       |
|-----------------------|-----------------------|-----------------------|-----------------------|-----------------------|
| <input type="radio"/> |
| Not at all satisfied  | A little satisfied    | Somewhat satisfied    | Very satisfied        | Extremely satisfied   |

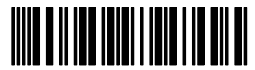

## Section G: Information and Support

When women are diagnosed with breast cancer, they receive different types of information from their doctor(s) about diagnosis and treatment.

**G1. For each item below, please mark the ONE response that best describes your experience.**

*The information I received from my doctor(s) or their staff about...*

|                                                                                                            | Not at all useful     | A little useful       | Somewhat useful       | Very useful           | Extremely useful      | Did not get           |
|------------------------------------------------------------------------------------------------------------|-----------------------|-----------------------|-----------------------|-----------------------|-----------------------|-----------------------|
| a. ...how to manage side effects of radiation was . . . . .                                                | <input type="radio"/> |
| b. ...how to manage side effects of chemotherapy was . . . . .                                             | <input type="radio"/> |
| c. ...hormone therapy (such as Tamoxifen or Arimidex) was . . . . .                                        | <input type="radio"/> |
| d. ...alternative or holistic treatments was . . . . .                                                     | <input type="radio"/> |
| e. ...nutrition and/or diet was . . . . .                                                                  | <input type="radio"/> |
| f. ...the effects of breast cancer and treatment on sexual functioning was . . . . .                       | <input type="radio"/> |
| g. ...the effects of having breast cancer on one's relationship with their spouse or partner was . . . . . | <input type="radio"/> |
| h. ...how to manage recovery after surgery was . . . . .                                                   | <input type="radio"/> |
| i. ...feelings of anxiety or depression was . . . . .                                                      | <input type="radio"/> |
| j. ...Other (please explain)                                                                               | <hr/> <hr/>           |                       |                       |                       |                       |                       |

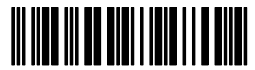

G2. *Would you have liked more information from your doctor(s) or their staff about...*

|                                                                                                     |                           |                          |
|-----------------------------------------------------------------------------------------------------|---------------------------|--------------------------|
| a. ...the surgical treatment options such as lumpectomy or mastectomy? .....                        | <input type="radio"/> Yes | <input type="radio"/> No |
| b. ...how likely breast cancer is to come back once it's been treated?                              | <input type="radio"/> Yes | <input type="radio"/> No |
| c. ...different types of breast reconstruction? .....                                               | <input type="radio"/> Yes | <input type="radio"/> No |
| d. ...how to manage side effects of radiation treatment? .....                                      | <input type="radio"/> Yes | <input type="radio"/> No |
| e. ...how to manage side effects of chemotherapy treatment? .....                                   | <input type="radio"/> Yes | <input type="radio"/> No |
| f. ...hormone therapy (such as Tamoxifen or Arimidex)? .....                                        | <input type="radio"/> Yes | <input type="radio"/> No |
| g. ...alternative or holistic treatments? .....                                                     | <input type="radio"/> Yes | <input type="radio"/> No |
| h. ...nutrition and/or diet? .....                                                                  | <input type="radio"/> Yes | <input type="radio"/> No |
| i. ...the effects of breast cancer and treatment on sexual functioning?                             | <input type="radio"/> Yes | <input type="radio"/> No |
| j. ...the effects of having breast cancer on one's relationship with their spouse or partner? ..... | <input type="radio"/> Yes | <input type="radio"/> No |
| k. ...how to manage recovery after surgery? .....                                                   | <input type="radio"/> Yes | <input type="radio"/> No |
| l. ...what to do about feelings of anxiety or depression? .....                                     | <input type="radio"/> Yes | <input type="radio"/> No |
| m. ...other (please explain)                                                                        |                           |                          |
| <hr/>                                                                                               |                           |                          |
| <hr/>                                                                                               |                           |                          |

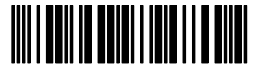

G3. Did any of your doctor(s) or their staff make arrangements for you to talk to women with breast cancer, or go to a support group for women with breast cancer?

- No
- Yes

G4. Did you talk to any women with breast cancer?

**Please mark ALL that apply.**

- No, I didn't talk to women with breast cancer.
  - Yes, patients who my doctor referred me to.
  - Yes, a breast cancer support group.
  - Yes, a family member who has had breast cancer.
  - Yes, a friend or neighbor who has had breast cancer.
  - Other (please specify)
- 

G5. What was your experience talking to other women with breast cancer?

**Please mark ALL that apply.**

- I didn't talk to women with breast cancer.
  - Talking to other women helped me make treatment decisions.
  - Talking to other women helped me emotionally.
  - Talking to other women made me doubt my treatment decisions.
  - Talking to other women helped me know what to expect.
  - Talking to other women made me scared or anxious about treatment.
  - Talking to other women helped me cope with the challenges and side effects of treatment.
  - Talking to other women made me wonder why I didn't get the same treatments they had.
  - Other (please explain)
- 
- 

G6. Would you have liked more contact with other women with breast cancer?

- No
- Yes
- I'm not sure.

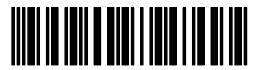

## Section H: Decision Making

We are interested in learning about your experiences when decisions were being made about treatment for your breast cancer.

H1. Which of the following statements best describes how the decision was made about which surgical treatment to have for your breast cancer (that is, whether to have a lumpectomy or mastectomy.) **Please mark ONE.**

- My surgeon(s) made the decision with little input from me.
- My surgeon(s) made the decision but seriously considered my opinion.
- My surgeon(s) and I made the decision together.
- I made the decision after seriously considering my surgeon(s) opinion.
- I made the decision with little input from my surgeon(s).

H2. We would like to know how you feel about how this decision was made (that is, the decision about whether to have a mastectomy or lumpectomy). **Please mark the ONE statement that best describes how you feel.**

- I wish my surgeon(s) had been more involved in making this decision.
- My level of involvement in this decision was right for me.
- I wish I had been more involved in making this decision.

H3. How important was your husband's or partner's opinion in the decision about which surgical treatment to have for your breast cancer?

|                       |                       |                       |                       |                       |
|-----------------------|-----------------------|-----------------------|-----------------------|-----------------------|
| <input type="radio"/> |
| Not at all important  | A little important    | Somewhat important    | Quite important       | Very important        |

H4. How important was the opinion of another family member in the decision about which surgical treatment to have for your breast cancer?

|                       |                       |                       |                       |                       |
|-----------------------|-----------------------|-----------------------|-----------------------|-----------------------|
| <input type="radio"/> |
| Not at all important  | A little important    | Somewhat important    | Quite important       | Very important        |

H5. How important was a friend's opinion in the decision about which surgical treatment to have for your breast cancer?

|                       |                       |                       |                       |                       |
|-----------------------|-----------------------|-----------------------|-----------------------|-----------------------|
| <input type="radio"/> |
| Not at all important  | A little important    | Somewhat important    | Quite important       | Very important        |

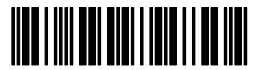

H6. For each item below, please mark ONE.

*When decisions were being made about your surgery, how important was it that the type of surgery you had. . .*

|                                                                                                    | Not at all important  | Somewhat important    | Very important        |
|----------------------------------------------------------------------------------------------------|-----------------------|-----------------------|-----------------------|
| a. ...would keep you from worrying about the cancer coming back . . . .                            | <input type="radio"/> | <input type="radio"/> | <input type="radio"/> |
| b. ...would allow you to avoid the possibility of a second surgery to remove more cancer . . . . . | <input type="radio"/> | <input type="radio"/> | <input type="radio"/> |
| c. ...would not make you feel bad about your body, like it was disfigured                          | <input type="radio"/> | <input type="radio"/> | <input type="radio"/> |
| d. ...would not interfere with your sex life in the long term . . . . .                            | <input type="radio"/> | <input type="radio"/> | <input type="radio"/> |
| e. ...would allow you to avoid exposing yourself to radiation . . . . .                            | <input type="radio"/> | <input type="radio"/> | <input type="radio"/> |
| f. ...would allow you to avoid going back and forth to radiation treatments . . . . .              | <input type="radio"/> | <input type="radio"/> | <input type="radio"/> |
| g. ...would allow you to feel feminine . .                                                         | <input type="radio"/> | <input type="radio"/> | <input type="radio"/> |
| h. ...would reduce the chances of the cancer coming back . . . . .                                 | <input type="radio"/> | <input type="radio"/> | <input type="radio"/> |

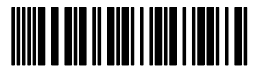

Please mark the response below that most closely matches how much you agree or disagree with the following statements:

*If I had it to do over. . .*

H7. . . . I would make a different decision about what type of surgery to have (that is whether to have a lumpectomy or mastectomy.)

|                       |                       |                            |                       |                       |
|-----------------------|-----------------------|----------------------------|-----------------------|-----------------------|
| <input type="radio"/> | <input type="radio"/> | <input type="radio"/>      | <input type="radio"/> | <input type="radio"/> |
| Strongly disagree     | Disagree              | Neither agree nor disagree | Agree                 | Strongly agree        |

H8. . . . I would choose a different surgeon to perform my surgery.

|                       |                       |                            |                       |                       |
|-----------------------|-----------------------|----------------------------|-----------------------|-----------------------|
| <input type="radio"/> | <input type="radio"/> | <input type="radio"/>      | <input type="radio"/> | <input type="radio"/> |
| Strongly disagree     | Disagree              | Neither agree nor disagree | Agree                 | Strongly agree        |

H9. . . . I would take more time to make decisions about my treatment.

|                       |                       |                            |                       |                       |
|-----------------------|-----------------------|----------------------------|-----------------------|-----------------------|
| <input type="radio"/> | <input type="radio"/> | <input type="radio"/>      | <input type="radio"/> | <input type="radio"/> |
| Strongly disagree     | Disagree              | Neither agree nor disagree | Agree                 | Strongly agree        |

H10. . . . I would make decisions about my treatment more quickly.

|                       |                       |                            |                       |                       |
|-----------------------|-----------------------|----------------------------|-----------------------|-----------------------|
| <input type="radio"/> | <input type="radio"/> | <input type="radio"/>      | <input type="radio"/> | <input type="radio"/> |
| Strongly disagree     | Disagree              | Neither agree nor disagree | Agree                 | Strongly agree        |

H11. . . . I would consult more doctors about my treatment before making a decision.

|                       |                       |                            |                       |                       |
|-----------------------|-----------------------|----------------------------|-----------------------|-----------------------|
| <input type="radio"/> | <input type="radio"/> | <input type="radio"/>      | <input type="radio"/> | <input type="radio"/> |
| Strongly disagree     | Disagree              | Neither agree nor disagree | Agree                 | Strongly agree        |

H12. . . . I would do everything the same.

|                       |                       |                            |                       |                       |
|-----------------------|-----------------------|----------------------------|-----------------------|-----------------------|
| <input type="radio"/> | <input type="radio"/> | <input type="radio"/>      | <input type="radio"/> | <input type="radio"/> |
| Strongly disagree     | Disagree              | Neither agree nor disagree | Agree                 | Strongly agree        |



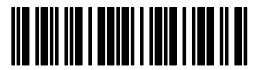

## Section I: Home and Work

Now we'd like to ask some questions about your work and family life before and after you were diagnosed with breast cancer.

I1. Before you were diagnosed with breast cancer, did you work for pay?

Yes

No (please go to question I9, page 26) →

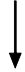

I2. What type of work was this?

---

---

I3. On average, about how many hours per week did you work before your diagnosis?

     hours

I4. About how many days of work have you missed because of your breast cancer or its treatment?

- I haven't missed any work.
- less than a week
- 7 - 14 days
- 15 - 30 days
- more than a month
- I stopped working all together.

I5. Which of the following was available to you through your work?

**Please mark ALL that apply.**

- Medical insurance
- Paid sick leave
- Disability benefits
- Flexible work schedule
- None of the above
- Other (please explain) \_\_\_\_\_

I6. Did you work for pay during any of your breast cancer treatment?

- Yes
- No

Please continue on next page, Question I7.

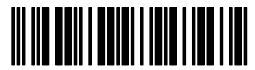

17. As a result of your breast cancer or its treatment did you have any of the following experiences?

- a. I arranged to work fewer hours . . . . .  Yes  No
- b. I changed jobs within the company . . . . .  Yes  No
- c. I took time off. . . . .  Yes  No
- d. I quit my job. . . . .  Yes  No
- e. I lost my job . . . . .  Yes  No
- f. I had trouble doing my job well . . . . .  Yes  No
- g. I decided to keep my job to keep my health insurance. . . . .  Yes  No
- h. Other (please explain)

---



---

18. Please indicate if your employer did any of the things below to help you when you were being treated for breast cancer.  
(If you did not have an employer, please mark 'Does not apply'.)

*My employer...*

- a. ... developed a plan with me so I could take the necessary time off . . . . .  Yes  No  Does not apply
- b. ... allowed me flexibility in my schedule so I could get treatments . . . . .  Yes  No  Does not apply
- c. ... paid me for sick days . . . . .  Yes  No  Does not apply
- d. ... didn't do anything to help . . . . .  Yes  No  Does not apply
- e. Other (please explain)

---



---

**Please continue on next page, Question I9.**

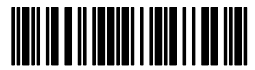

I9. As a result of breast cancer or its treatment:

- a. Have you lost family income? . . . . .  Yes  No  Does not apply
- b. Have household chores been left undone? . . . .  Yes  No  Does not apply
- c. Has your husband or partner missed work? . . . .  Yes  No  Does not apply
- d. Has your husband or partner had trouble doing his/her job well? . . . . .  Yes  No  Does not apply
- e. Have your children missed school? . . . . .  Yes  No  Does not apply
- f. Have your children had trouble in school? . . . .  Yes  No  Does not apply
- g. Do you worry about keeping your job? . . . . .  Yes  No  Does not apply
- h. Do you worry about getting a new job in the future? . . . . .  Yes  No  Does not apply

I10. We'd like to learn about how your illness has affected your finances.

**Please mark ALL of the responses below that apply to you and/or your family.**

*Due to the financial impact of having breast cancer. . .*

- I had to use savings.
- I could not make payments on credit cards or other bills.
- I cut down on spending for food and/or clothes.
- I cut down on spending for health care for other family members.
- I cut down on spending for activities for the children.
- I cut down on recreational activities such as going out for dinner or to the movies.
- I cut down on purchasing household items.
- I cut down on expenses in general.
- My illness has had no impact on my finances.
- Other (please explain)

I11. How much do you worry about current or future financial problems as a result of your breast cancer and treatments?

- |                       |                       |                       |                       |                       |
|-----------------------|-----------------------|-----------------------|-----------------------|-----------------------|
| <input type="radio"/> |
| Not at all            | A little bit          | Somewhat              | Quite a bit           | Very much             |

I12. Are you currently working for pay?  Yes  No

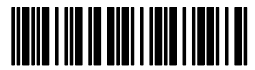

## Section J: Experiences with Symptoms

The next questions ask about symptoms you may have had recently or when you were being treated for breast cancer. **Please indicate how much you experienced these symptoms when you were being treated for breast cancer.**

|     | <i>During your treatment for breast cancer. . .</i>                                                          | Not at all            | A little bit          | Some-what             | Quite a bit           | Very much             |
|-----|--------------------------------------------------------------------------------------------------------------|-----------------------|-----------------------|-----------------------|-----------------------|-----------------------|
| J1. | ...have you had pain or swelling in the arm? . . . . .                                                       | <input type="radio"/> |
| J2. | ...have you had pain or swelling in the affected breast? . . . . .                                           | <input type="radio"/> |
| J3. | ...have you had skin problems on or near the area of your breast where you had your surgery? . . . . .       | <input type="radio"/> |
| J4. | ...have you experienced any hot flashes?                                                                     | <input type="radio"/> |
| J5. | ...have you experienced any vaginal dryness? . . . . .                                                       | <input type="radio"/> |
| J6. | ...have you been more tired than usual? .                                                                    | <input type="radio"/> |
| J7. | ...Other (please specify) _____                                                                              |                       |                       |                       |                       |                       |
| J8. | Do you think that your doctor(s) and their staff did everything they could to help you manage your symptoms? | <input type="radio"/> |
|     |                                                                                                              | Not at all            | A little bit          | Somewhat              | Quite a bit           | Very much             |

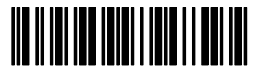

## Section K: How You Have Been Feeling Recently

Below is a list of statements that other people with your illness have said are important. **By marking one (1) response per line, please indicate how true each statement has been for you during the past 7 days.**

| <u>Physical Well-Being</u>                                                                   | Not at all            | A little bit          | Some-what             | Quite a bit           | Very much             |
|----------------------------------------------------------------------------------------------|-----------------------|-----------------------|-----------------------|-----------------------|-----------------------|
| K1. I have a lack of energy. . . . .                                                         | <input type="radio"/> |
| K2. I have nausea. . . . .                                                                   | <input type="radio"/> |
| K3. Because of my physical condition, I have trouble meeting the needs of my family. . . . . | <input type="radio"/> |
| K4. I have pain. . . . .                                                                     | <input type="radio"/> |
| K5. I am bothered by side effects of treatment. . . . .                                      | <input type="radio"/> |
| K6. I feel ill. . . . .                                                                      | <input type="radio"/> |
| K7. I am forced to spend time in bed. . . . .                                                | <input type="radio"/> |

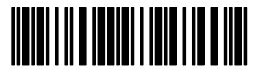

By marking one (1) response per line, please indicate how true each statement has been for you during the past 7 days.

| <u>Social/Family Well-Being</u>                                                                                                                                                                                                 |                                                                            | Not at all            | A little bit          | Some-what             | Quite a bit           | Very much             |
|---------------------------------------------------------------------------------------------------------------------------------------------------------------------------------------------------------------------------------|----------------------------------------------------------------------------|-----------------------|-----------------------|-----------------------|-----------------------|-----------------------|
| K8.                                                                                                                                                                                                                             | I feel close to my friends. . . . .                                        | <input type="radio"/> |
| K9.                                                                                                                                                                                                                             | I get emotional support from my family. . . . .                            | <input type="radio"/> |
| K10.                                                                                                                                                                                                                            | I get support from my friends. . . . .                                     | <input type="radio"/> |
| K11.                                                                                                                                                                                                                            | My family has accepted my illness.                                         | <input type="radio"/> |
| K12.                                                                                                                                                                                                                            | I am satisfied with family communication about my illness. . .             | <input type="radio"/> |
| K13.                                                                                                                                                                                                                            | I feel close to my partner (or the person who is my main support). . . . . | <input type="radio"/> |
| <p><i>Regardless of your current level of sexual activity, please answer the following question. If you prefer not to answer it, please mark this oval <input type="radio"/> and go to the next section (question K15).</i></p> |                                                                            |                       |                       |                       |                       |                       |
| K14.                                                                                                                                                                                                                            | I am satisfied with my sex life. . . . .                                   | <input type="radio"/> |

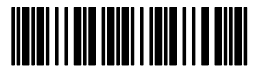

By marking one (1) response per line, please indicate how true each statement has been for you during the past 7 days.

| <u>Emotional Well-Being</u>                                    | Not at all            | A little bit          | Some-what             | Quite a bit           | Very much             |
|----------------------------------------------------------------|-----------------------|-----------------------|-----------------------|-----------------------|-----------------------|
| K15. I feel sad. ....                                          | <input type="radio"/> |
| K16. I am satisfied with how I am coping with my illness. .... | <input type="radio"/> |
| K17. I am losing hope in the fight against my illness. ....    | <input type="radio"/> |
| K18. I feel nervous. ....                                      | <input type="radio"/> |
| K19. I worry about dying. ....                                 | <input type="radio"/> |
| K20. I worry that my condition will get worse.                 | <input type="radio"/> |

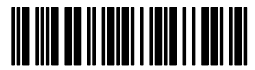

By marking one (1) response per line, please indicate how true each statement has been for you during the past 7 days.

| <b><u>Functional Well-Being</u></b>                              | Not at all            | A little bit          | Some-what             | Quite a bit           | Very much             |
|------------------------------------------------------------------|-----------------------|-----------------------|-----------------------|-----------------------|-----------------------|
| K21. I am able to work (include work at home). . . . .           | <input type="radio"/> |
| K22. My work (include work at home) is fulfilling. . . . .       | <input type="radio"/> |
| K23. I am able to enjoy life. . . . .                            | <input type="radio"/> |
| K24. I have accepted my illness. . . . .                         | <input type="radio"/> |
| K25. I am sleeping well. . . . .                                 | <input type="radio"/> |
| K26. I am enjoying the things I usually do for fun. . . . .      | <input type="radio"/> |
| K27. I am content with the quality of my life right now. . . . . | <input type="radio"/> |



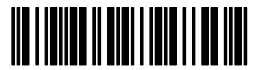

By marking one (1) response per line, please indicate how true each statement has been for you during the past 7 days.

| <u>Additional Concerns</u>                                                                      | Not at all            | A little bit          | Some-what             | Quite a bit           | Very much             |
|-------------------------------------------------------------------------------------------------|-----------------------|-----------------------|-----------------------|-----------------------|-----------------------|
| K28. I have been short of breath. . . . .                                                       | <input type="radio"/> |
| K29. I am self-conscious about the way I dress. . . . .                                         | <input type="radio"/> |
| K30. One or both of my arms are swollen or tender. . . . .                                      | <input type="radio"/> |
| K31. I feel sexually attractive. . . . .                                                        | <input type="radio"/> |
| K32. I am bothered by hair loss. . . . .                                                        | <input type="radio"/> |
| K33. I worry that other members of my family might someday get the same illness I have. . . . . | <input type="radio"/> |
| K34. I worry about the effect of stress on my illness. . . . .                                  | <input type="radio"/> |
| K35. I am bothered by a change in weight.                                                       | <input type="radio"/> |
| K36. I am able to feel like a woman. . . . .                                                    | <input type="radio"/> |
| K37. I have certain parts of my body where I experience significant pain. . . . .               | <input type="radio"/> |

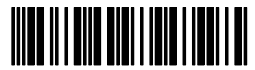

K38. Please mark the response below that indicates how true each statement is for you.

|                                                                          | Not at all            | A little bit          | Some-what             | Quite a bit           | Very much             |
|--------------------------------------------------------------------------|-----------------------|-----------------------|-----------------------|-----------------------|-----------------------|
| a. I worry about my breast cancer coming back in the same breast. . . .  | <input type="radio"/> |
| b. I worry that breast cancer may occur in my other breast. . . . .      | <input type="radio"/> |
| c. I worry that breast cancer will spread to other parts of my body. . . | <input type="radio"/> |

### Section L: Language Preferences

L1. Do you speak Spanish?

Yes, I speak Spanish.

No, I don't speak Spanish.

(please go to Question M1, page 35) →

L2. In general, what language(s) do you read and speak?

- Only English     
 English better than Spanish     
 Both equally     
 Spanish better than English     
 Only Spanish

L3. What language do you usually speak at home?

- Only English     
 More English than Spanish     
 Both equally     
 More Spanish than English     
 Only Spanish

L4. In what language do you usually think?

- Only English     
 More English than Spanish     
 Both equally     
 More Spanish than English     
 Only Spanish

L5. What language do you usually speak with your friends?

- Only English     
 More English than Spanish     
 Both equally     
 More Spanish than English     
 Only Spanish

L6. In general, when talking to health care providers such as doctors and nurses, what language do you prefer to use?

- Only English     
 More English than Spanish     
 Both equally     
 More Spanish than English     
 Only Spanish

Please continue on next page, Question L7.

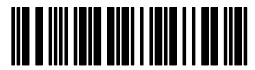

L7. When you met with your surgeon to discuss your breast cancer treatment, who helped translate what the doctor was saying? **Please mark ALL that apply.**

- I did not need help translating.
- My husband/partner
- My child or another family member
- Someone from the doctor's office
- My doctor spoke Spanish.
- Other (please specify)

---

---

L8. Did you get as much help with translation as you needed?

- I didn't need help.
- No
- Yes

L9. Which of the following sources were available to you in Spanish?

**Please mark ALL that apply.**

- Pamphlets about breast cancer and breast cancer treatments
- Consent forms
- Insurance forms
- Appointment slips
- Other (please specify) \_\_\_\_\_
- No written information was available in Spanish.
- I don't know.

L10. Was there anything that you wanted in Spanish that was not available to you in Spanish? (please list)

---

---

**Please continue on next page, Question M1.**

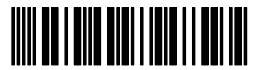

## Section M: A Few More Questions About You

- M1. Which of the following members of your family had been diagnosed with breast cancer at the time of your recent breast cancer diagnosis? **(Please include only family members who are related by blood.)**  
**Please mark ALL that apply.**
- Mother
  - Sister
  - Daughter
  - Grandmother
  - Aunt
  - No family members had been diagnosed with breast cancer.
- M2. Please indicate which item below best describes your experience with your menstrual period 12 months prior to your diagnosis with breast cancer.
- I had no menstrual periods in the 12 months prior to my breast cancer diagnosis.
  - I had regular (or the usual timing of) menstrual periods in the 12 months prior to my breast cancer diagnosis.
  - I had a change in the timing of menstrual periods in the 12 months prior to my breast cancer diagnosis.
- M3. Did you experience hot flashes or night sweats at any time during the 12 months prior to your breast cancer diagnosis?
- Yes
  - No
- M4. What is your birth date: month/day/year?     /  /
- M5. About how tall are you?     feet     inches    or    .  meters
- M6. About how much did you weigh at the time of your breast cancer diagnosis?  
 pounds    or     kilograms
- M7. On average, how many cigarettes did you smoke a day at the time of your breast cancer diagnosis?
- None, I didn't smoke.
  - less than one pack a day
  - about one pack a day
  - more than one pack a day

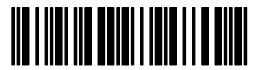

- M8. What is the highest level of education you have completed?
- Grade School or less
  - Some College or Technical School
  - Some High School
  - College Graduate (Bachelor's Degree)
  - High School Graduate or G.E.D.
  - Graduate Degree

M9. When you were diagnosed with breast cancer, what was your marital status?  
**Please mark ONE.**

- Married
- Separated
- Widowed
- Never married
- Divorced
- Living with your partner

M10. Are you Hispanic/Latina?

- Yes
- No

M11. Which of the following best describes your race? **Please mark ALL that apply.**

- White
- Black, African-American or Negro
- American Indian or Alaska Native
- Asian or Pacific Islander
- Some other race (Please specify) \_\_\_\_\_

M12. In what country were you born? \_\_\_\_\_

- I don't know.

M13. How many years total have you lived in the U.S.?

- \_\_\_\_\_ years
- I have lived in the U.S. my entire life.
- I don't know.

M14. In what country was your mother born? \_\_\_\_\_

- I don't know.

M15. In what country was your father born? \_\_\_\_\_

- I don't know.

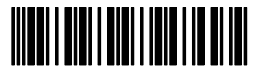

M16. When you were diagnosed with breast cancer, what type of medical insurance did you have? **Please mark ALL that apply.**

- No insurance
- Employer provided insurance
- Self purchased insurance
- Spouse's insurance
- Medi-Cal or state provided insurance
- Medicare
- Other \_\_\_\_\_

M17. When you were diagnosed with breast cancer, which of the following choices best described your work situation? **Please mark ALL that apply.**

- I worked full-time.
- I worked part-time.
- I worked occasionally.
- I was a homemaker.
- I was a student.
- I was unemployed.
- I was disabled (unable to work).
- I was retired.
- I don't remember.

M18. When you were diagnosed with breast cancer, what was the total yearly income of your entire household, before tax deductions, from all sources?

- less than \$10,000
- \$10,000 - \$19,999
- \$20,000 - \$29,999
- \$30,000 - \$39,999
- \$40,000 - \$49,999
- \$50,000 - \$59,999
- \$60,000 - \$69,999
- \$70,000 - \$89,000
- \$90,000 or more
- I don't know.

M19. When you were diagnosed with breast cancer, how many people were supported by the total income for your household including yourself?

- 1 (just you)
- 2
- 3
- 4 or more

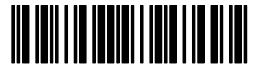

M20. Can you describe the most important thing that would have improved your experience when you were being treated for breast cancer?

---

---

---

---

M21. Is there any way we could improve this questionnaire?

---

---

---

---

M22. Did anyone help you fill out this questionnaire?

- No
- Yes

M23. Today's date is:      /      /       
                                  month      day            year

**Thank you very much for filling out this survey!  
Your answers are very important to us.**

**Please return the survey in the envelope provided or mail to:**

**Breast Cancer Treatment Study  
Parkview Medical Building PMB-A201  
1420 San Pablo Street  
Los Angeles, CA 90089-9047**

**If you have any questions, please call Alma Acosta-Pegueros at (323) 442-2712.**
